# Supplementary figures and images for: A Review of the Use of Extracellular Vesicles in the Treatment of Neonatal Diseases: Current State and Problems with Translation to the Clinic
Source: MDPI journal article supplement (doi:10.3390/ijms25052879), 2024-03-01

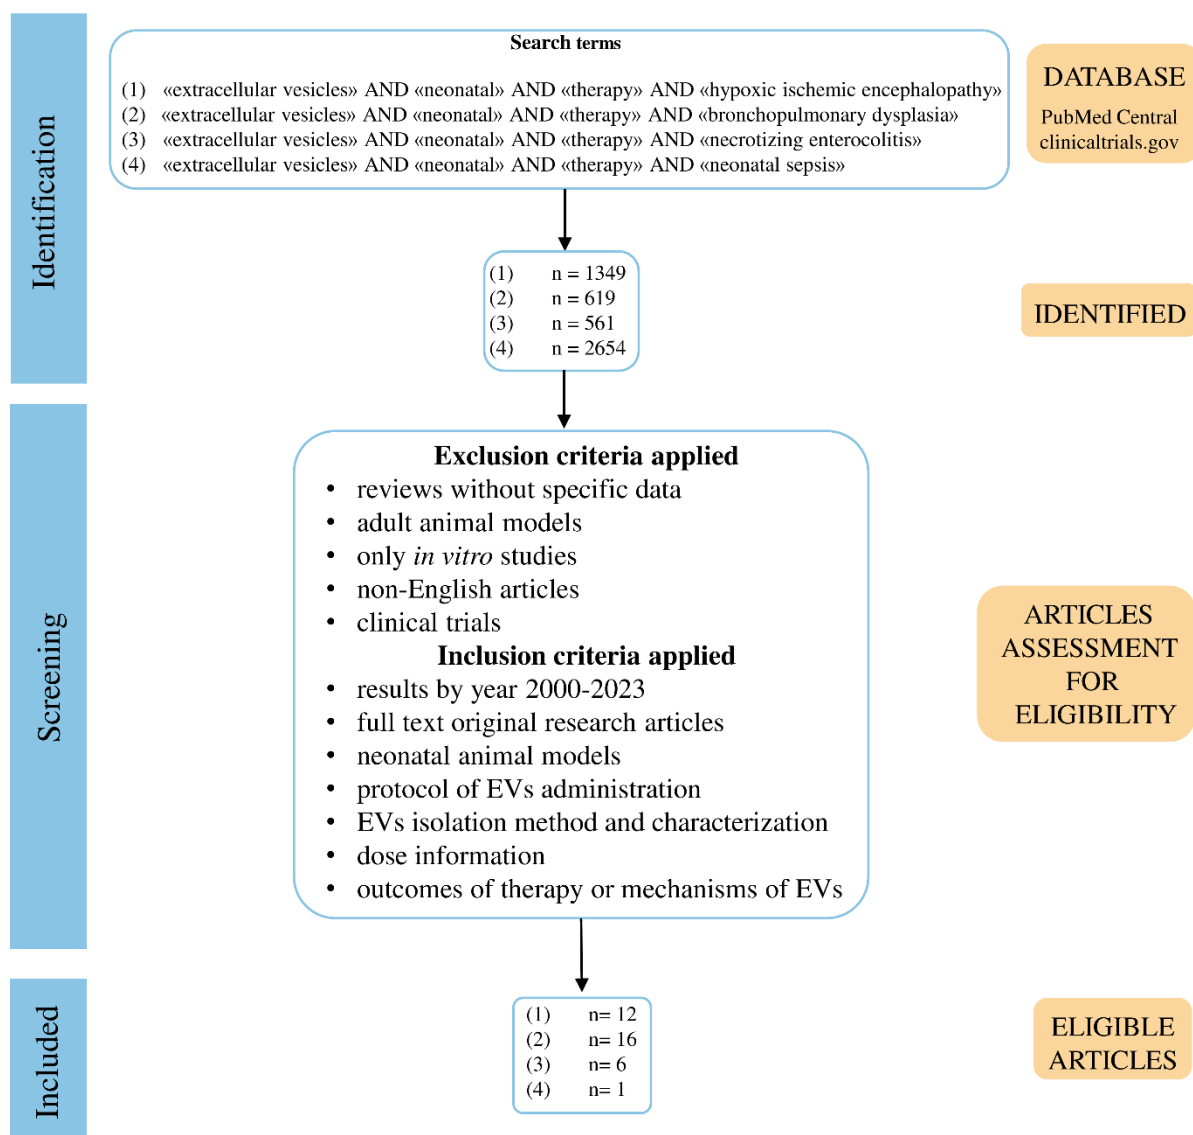

**Figure S1.** Flowchart of article selection for Table 1.

Supplement: s1 [file s1]
